# Supplementary material
Source: publisher figshare collection journal article supplement (https://rs.figshare.com/ndownloader/files/20713824)
Supplement: Supplementary file 1 [file 20713824]

## Sheet: Enamel Fracture Mechanics Data
Genus_Species	Specimen Catalog #	Tooth	Buccal Cusp Thickness	Lingual Cusp thickness	Buccal lateral thickness	Lingual lateral thickness	BCD (mm)*	Prf Protoconid	Prf Metaconid	Pmf Protoconid	Pmf Metaconid	RET*	AET*	Absolute Crown Strength (ACS)
A_boisei	Omo47-1973-1500	RM2	1.98	1.96	2.16	2.19	13.72	2159.82	2134.08	1760.69	1778.77	24.82	1.69	3.40491
A_boisei	KNM-ER 15930	LM2	1.97	1.86	2.23	2.19	11.19	2020.58	1884.05	1551.98	1530.14	26.69	1.65	3.03838
A_boisei	KNM-ER 3230	LM2	2.5	2.66	3.33	2.75	16.8	3034.85	3268.41	2842.95	2455.79	29.5	2.51	4.59173
A_boisei	L427-7	LM2	3.04	2.56	3.1	2.28	12.81	3596.8	2894.64	2222.71	1741.75	36.65	2.5	4.00156
A_boisei	KNM-ER 3230	RM3	2.5	3.57	3.1	2.57	15.19	2944.27	4587.14	2500.98	2164.33	36.81	2.72	4.54515
A_boisei	KNM-ER 15930	LM3	2.82	3.25	2.74	2.18	13	3280.25	3931.28	2031.41	1702.15	34.53	2.38	3.93319
A_boisei	L628-3	LM3	2.85	3.24	3.02	2.7	14.3	3402.52	3998.97	2347.33	2149.65	30.3	2.63	4.33642
A_robustus	DNH60B	RM1	1.7	1.82	2.04	1.71	10.8	1672.82	1816.43	1411.36	1234.86	30.22	1.7	3.02985
A_robustus	SK6	RM1	1.9	1.9	2.41	1.75	12.46	1995.64	1995.64	1781.44	1402.07	19.65	1.43	2.98478
A_robustus	SK61	RM1	2.38	2.4	2.34	2	12.8	2643.67	2671.14	1775.7	1577.77	24.32	1.85	3.44093
A_robustus	SK63	RM1	1.73	1.84	2.34	1.73	10.99	1717.27	1849.9	1591.83	1262.15	29.77	1.92	3.24814
A_robustus	SK(826b)828	LM1	1.51	1.64	2.3	2.23	12.01	1506.05	1657.55	1672.83	1633.3	22.59	1.68	3.17622
A_robustus	SK62	LM1	2.06	1.98	2.35	1.94	10.89	2119.19	2018.12	1587.08	1366.16	31.69	2.1	3.38149
A_robustus	DNH60C	RM2	3.04	2.71	2.5	2.04	11.77	3532.27	3047.86	1760.85	1503.36	37.74	2.17	3.57358
A_robustus	SK25	RM2	2.92	2.8	2.67	2.46	12.11	3374.13	3197.92	1893.52	1773.79	36	2.52	3.90623
A_robustus	SKX4446	RM2	2.5	2.5	2.73	2.24	14.31	2894.76	2894.76	2169.24	1867.54	24.88	1.95	3.73527
A_robustus	SK1	LM2	2.62	2.91	2.78	2.62	13.44	3015.99	3440.06	2103.76	2007.92	25.66	1.95	3.61994
A_robustus	SK1587a	LM2	2.15	2.28	2.34	2.14	10.81	2230.58	2400.8	1573.54	1465.94	31.93	1.96	3.25481
A_robustus	SK6	LM2	3.11	2.7	2.78	2.13	14.17	3788.57	3173.87	2184.58	1786.22	31.02	2.28	4.01918
A_robustus	SK843.846a	LM2	2.5	2.17	2.36	1.98	13.03	2822.75	2372.87	1810.81	1587.62	28.22	2.02	3.62771
A_robustus	SKW5	LM2	2.5	2.08	2.45	2.11	12.4	2787.3	2222.19	1798.24	1603.21	30.18	2.11	3.6169
A_robustus	SK23	RM3	2.57	2.51	2.51	2.54	12.71	2903.06	2818.72	1865.37	1882.83	26.33	1.9	3.47484
A_robustus	SK75	RM3	2.8	2.56	2.41	2.24	13.13	3258.65	2912.86	1850.51	1750.26	26.96	2	3.62353
A_robustus	SK851	RM3	2.65	2.68	2.5	2.41	15.55	3181.25	3225.17	2157.75	2100	24.92	1.97	3.91366
A_robustus	SKW5	RM3	2.57	2.34	2.5	2.26	12.49	2890.51	2572.14	1836.45	1698.16	31.51	2.22	3.72343
A_robustus	SKX10643	RM3	2.33	2.12	2.25	2.38	12.47	2557.49	2277.87	1690.41	1765.2	29.56	1.95	3.48687
A_robustus	SKX5014	RM3	2.16	2.43	2.19	2.21	14.06	2413.49	2782.39	1812.18	1824.39	22.73	1.72	3.4773
A_robustus	SK6	LM3	2.85	2.97	2.62	2.1	13.91	3379.09	3558.82	2058.44	1742.8	32.18	2.23	3.93823
A_robustus	SK81	LM3	2.18	2.14	2.42	2.25	12.64	2365.64	2312.91	1805.79	1707.35	26.04	1.93	3.49251
A_robustus	SK843.846a	LM3	2.4	2.28	2.46	2.03	11.4	2593.96	2432.49	1699.84	1462.77	28.06	2.06	3.42666
A_robustus	TM1600	LM3	2.23	2.5	2.6	1.97	13.75	2491.07	2863.25	2029.15	1648.85	25.67	1.81	3.52757
A_afarensis	AL145-35	LM1	1.32	1.6	1.78	1.58	11.53	1273.09	1588.86	1336.96	1226.22	18.37	1.26	2.69516
A_afarensis	AL333w-1a	LM1	1.15	1.11	1.76	1.87	11.21	1079.7	1038.48	1297.71	1357.63	20.61	1.29	2.68895
A_afarensis	AL128-23	RM2	1.89	1.72	2.09	1.5	11.18	1920.5	1714.23	1474.63	1153.3	23.17	1.26	2.65394
A_afarensis	AL145-35	LM2	2.14	1.86	2.04	1.64	12.09	2284.28	1927.73	1533.71	1307.12	21.73	1.48	2.99109
A_afarensis	AL241-14	LM2	2.44	2.08	2.46	1.9	12.56	2713	2230.4	1820.66	1497.54	28.44	1.64	3.20924
A_afarensis	AL333w-1a	LM2	2.18	1.62	2.42	1.95	11.14	2286.84	1594.55	1650.84	1394.71	25.92	1.54	2.92879
A_afarensis	AL333w-32	RM3	1.85	2.06	2.36	1.86	13.03	1960.84	2228.48	1810.81	1517.02	24.08	1.55	2.87024
A_afarensis	AL400-1a	RM3	1.5	1.78	2.08	1.75	10.63	1434.44	1760.08	1416.51	1241.31	24.82	1.52	3.14687
A_africanus	STS24	RM1	1.5	1.7	2.01	1.5	9.81	1398.7	1626.89	1302.09	1041.87	26.26	1.53	2.73946
A_africanus	STS9	RM1	1.84	2.08	1.89	2.29	11.66	1882.24	2184.21	1409.61	1632.01	28.03	1.78	3.2214
A_africanus	STW106	RM1	0.84	1.41	1.56	1.4	10.56	751.372	1331.29	1134.67	1049.76	18.17	1.09	2.399
A_africanus	STW123a	RM1	2.25	2	2.03	1.58	10.86	2363.83	2041.73	1411.68	1170.3	27.36	1.67	3.01133
A_africanus	STW309a	RM1	1.41	1.45	1.77	1.62	12.04	1393.82	1438.91	1376.49	1291.52	18.8	1.37	2.87183
A_africanus	STW151	LM1	1.62	1.74	2.09	1.56	9.8	1533.87	1673.34	1342.15	1071.63	26.41	1.5	2.71109
A_africanus	STW246	LM1	1.44	1.13	2	1.64	10.77	1373.37	1042.39	1387.12	1194.86	20.55	1.4	2.74572
A_africanus	STW327	LM1	1.51	1.62	1.8	1.67	11.55	1485.93	1613.12	1349.8	1277.83	20.19	1.42	2.86365
A_africanus	STW421B	LM1	1.21	1.18	1.76	1.47	12.34	1186.63	1154.6	1397.27	1230.27	16.87	1.29	2.82122
A_africanus	Taung 1	LM1	1.35	1.5	1.95	1.74	11.71	1313.34	1481.5	1447.57	1330.61	19.71	1.29	2.74826
A_africanus	STW109	RM2	2.37	2.27	2.73	2.09	14.89	2744.46	2606.29	2232.88	1830.81	23.96	1.72	3.57846
A_africanus	STW308	RM2	2.03	1.85	2.32	1.96	13.28	2202.27	1972.94	1812.6	1599.1	26.05	1.85	3.50485
A_africanus	STW404	RM2	2.5	2.2	2.82	2.23	11.78	2752.42	2346.76	1942.64	1610.49	25.13	1.85	3.3275
A_africanus	STW537	RM2	2.6	2.08	2.16	2.68	14.03	3021.26	2305.84	1790.94	2107.97	24.63	1.8	3.55345
A_africanus	STW61	RM2	2.03	2	2.52	1.78	13.31	2203.79	2165.02	1934.44	1494.67	25.08	1.65	3.31372
A_africanus	MDL2	LM2	2.18	2.39	1.75	2.17	14.43	2459.68	2747.06	1575.14	1836.17	22.35	1.62	3.41882
A_africanus	STW133	LM2	2.37	2.57	2.61	2.14	13.2	2651.89	2931.01	1976.19	1698.12	23.83	1.87	3.51312
A_africanus	STW213	LM2	1.58	2.06	2.63	1.92	11.78	1576.79	2164.64	1835.13	1437.31	23.74	1.59	3.06025
A_africanus	STW3	LM2	2.41	2	2.72	2.05	12.89	2689.88	2143.88	2007.55	1615.44	28.03	1.91	3.50855
A_africanus	STW327	LM2	1.89	2.23	2.41	2.05	13.96	2056.49	2502.23	1936.08	1717.17	23.83	1.87	3.61284
A_africanus	STW412B	LM2	1.67	1.66	1.76	1.39	11.83	1684.86	1673	1352.33	1143.87	18.84	1.23	2.6973
A_africanus	STW498c	LM2	1.5	1.61	2.4	1.78	14.69	1611.37	1743.19	2005.1	1616.93	16.31	1.43	3.24089
A_africanus	STW555	LM2	1.26	1.26	1.83	1.51	11.18	1194.23	1194.23	1333.15	1158.77	18.8	1.33	2.72666
A_africanus	STW109	RM3	1.66	1.41	1.85	1.35	14.83	1810.53	1511.7	1673.71	1352.6	27.09	1.94	3.79277
A_africanus	STW14	RM3	1.44	1.53	1.83	1.38	12.84	1461.76	1565.6	1482.28	1216.98	25.52	1.92	3.5109
A_africanus	STW280	RM3	1.28	1.27	1.36	1.13	15.28	1380.69	1369.33	1394	1238.19	21.3	1.66	3.56124
A_africanus	STW384	RM3	1.31	1.48	1.75	1.44	15.41	1420.22	1618.9	1661.23	1457.52	20.2	1.72	3.64041
A_africanus	STW404	RM3	1.96	2.12	2.58	1.89	11.97	2046.9	2251.97	1827.2	1437.91	25.76	1.68	3.14566
A_africanus	STW520	RM3	1.38	1.81	2.19	1.74	12.65	1385.78	1892.89	1673.62	1412.95	20.22	1.41	2.98634
A_africanus	STW537	RM3	2.29	2.28	2.77	1.98	14.47	2611.13	2597.44	2211.6	1722.17	22.74	1.8	3.60874
A_africanus	STW498c	LM3	1.63	1.6	2.69	2.07	14.75	1770.21	1733.78	2192.5	1804.83	20.92	1.74	3.58225
A_africanus	STW586	LM3	2.17	2.1	2.53	1.87	11.59	2297.39	2206.4	1758.71	1392.14	28.66	1.85	3.27426
A_anamensis	KNM-KP 31712J	RM1	1.21	0.8	1.34	1.3	9.73	1084.47	687.935	953.989	933.585	17.72	1.02	2.22762
A_anamensis	KNM-KP 34275R	RM1	0.63	0.72	1.1	0.92	10.6	563.72	643.014	891.509	792.38	16.56	0.97	2.26738
A_anamensis	KNM-ER 20422	LM1	0.96	1.19	1.39	1.24	10.44	861.223	1091.49	1035.04	955.416	20.73	1.16	2.46073
A_anamensis	KNM-ER 30201	LM1	1.16	1.13	1.44	1.34	9.3	1016.88	986.785	970.617	920.934	22.76	1.13	2.29227
A_anamensis	KNM-ER 35232	LM1	1.24	1.46	1.75	1.35	10.32	1138.87	1376.3	1214.08	1004.61	24.92	1.32	2.60983
A_anamensis	KNM-KP 31728	LM1	1.64	1.43	1.44	1.3	9.2	1529.5	1295.47	962.648	893.456	25.71	1.16	2.30998
A_anamensis	KNM-ER 30500D	RM2	0.93	1.18	1.25	1.16	12.91	917.121	1176.63	1144.13	1089.3	18.19	1.31	2.90793
A_anamensis	KNM-ER 29286	LM2	1.5	1.67	1.94	1.49	12.72	1525.52	1725.78	1535.42	1272.66	17.8	1.15	2.70444
A_anamensis	KNM-ER 34725T	LM2	2.01	1.71	1.82	1.41	12.43	2133.53	1760.49	1439.7	1202.54	19.16	1.33	2.87506
A_anamensis	KNM-ER 35233	LM2	0.83	1.25	1.58	1.36	11.93	786.481	1213.41	1259.61	1134.56	16.71	1.11	2.57316
A_anamensis	KNM-ER 20428	LM3	1.17	1.67	2.37	1.86	13	1169.38	1738.66	1813.62	1514.3	22.65	1.5	3.1225
A_anamensis	KNM-ER 29281	LM3	1.21	1.08	2.02	1.41	11.03	1135.35	1001.21	1422.36	1092.14	18.87	1.16	2.52931
A_anamensis	KNM-KP 29286	LM3	1.3	1.86	1.91	1.54	12.4	1286.65	1942.77	1488.63	1275.71	22.29	1.34	2.88236
Gorilla	ZMB 31435	LM1	0.99	0.55	1.24	1.29	12.66	968.953	549.709	1119.58	1149.47	9.75	0.84	2.30591
Gorilla	ZMB 83546	LM1	0.58	0.55	0.99	0.82	12.88	582.542	555.515	981.874	873.158	8.87	0.79	2.25557
Gorilla	SMF 45713	RM2	0.76	0.69	1.29	1.02	13.72	775.851	708.519	1229.42	1057	11.67	1.01	2.63222
Gorilla	ZMB 30940	RM2	0.6	0.6	1.03	1.03	13.78	625.497	625.497	1067.56	1067.56	8.79	0.83	2.39138
Gorilla	ZMB 83581	RM2	0.8	0.6	1	0.78	14.18	829.559	636.521	1074.48	923.148	10.37	0.87	2.48361
Gorilla	ZMB 31435	LM2	0.89	0.8	1.34	1.26	12.92	877.568	789.459	1199.21	1150.94	12.25	1.07	2.62911
Gorilla	ZMB 83546	LM2	0.64	0.68	1.32	1.01	15.41	709.326	748.594	1377.16	1163.26	12.2	1.24	3.09099
Gorilla	ZMB 30940	RM3	0.6	0.96	1.12	0.98	13.63	621.362	972.437	1115.33	1024.89	10.06	0.87	2.43496
Gorilla	ZMB 30941	RM3	0.89	0.68	1.37	1.17	14.37	926.242	718.079	1329.93	1200.3	11.22	0.93	2.58497
Gorilla	ZMB 31626	RM3	1.17	0.89	1.56	1.37	12.82	1162.45	874.211	1322.12	1209.45	12.52	0.99	2.51911
Gorilla	ZMB 83581	RM3	0.82	0.82	1.34	0.98	13.44	825.596	825.596	1239.19	1012.4	11.66	0.87	2.41793
Gorilla	ZMB 31277	LM3	1.38	1.42	1.71	1.19	14.13	1447.64	1493.67	1524.03	1196.02	14.43	1.19	2.89954
Gorilla	ZMB 31435	LM3	1.29	1.29	1.41	0.92	11.69	1246.99	1246.99	1144.19	861.809	14.2	1.13	2.56999
H_sapiens	R1140-899	RM1	0.72	0.58	1.25	1.17	8.73	586.554	470.083	833.785	795.17	15.83	0.9	1.98204
H_sapiens	Belgian129a	LM1	0.62	0.88	1.49	1.37	7.57	470.173	689.087	855.194	801.38	16.99	0.95	1.89625
H_sapiens	Belgian93a	LM1	0.92	1.11	1.53	1.45	8.58	759.327	939.882	956.132	918.005	18.38	1.14	2.21147
H_sapiens	R913-759	RM2	1.35	1.14	1.67	1.36	9.41	1218.25	1000.96	1094.18	939.398	20.89	1.18	2.35625
H_sapiens	Belgian100f	LM2	1.15	1.25	1.55	1.22	9.59	1017.88	1120.32	1049.17	882.399	19.11	1.04	2.23311
H_sapiens	ULAC 58	LM2	1.41	1.32	1.65	1.61	10.37	1323.26	1225.67	1166.08	1145.12	19.6	1.18	2.47352
H_sapiens	ULAC 799-27	LM2	1.4	1.28	1.93	1.51	11.61	1364.51	1232.95	1427.21	1193.86	19.56	1.33	2.77861
H_sapiens	R2540-1650	RM3	1.82	1.46	1.65	1.57	6.93	1630.66	1230.55	872.644	837.912	27.37	1.4	2.2025
H_sapiens	R463	LM3	0.94	1.13	1.44	1.29	8.28	767.438	948.204	889.334	819.113	18.44	1.02	2.05495
Pan_pansicus	MRAC 29026	RM1	0.53	0.48	0.74	0.71	7	385.307	348.369	484.43	471.151	12.13	0.57	1.41244
Pan_pansicus	MRAC 29030	RM1	0.5	0.42	0.9	0.71	7.49	375.357	316.612	585.27	498.57	11.05	0.58	1.4738
Pan_pansicus	MRAC 84036M11	LM1	0.36	0.53	0.98	0.78	7.54	275.162	399.295	624.534	533.713	12.54	0.67	1.58931
Pan_pansicus	MRAC 22908	LM2	0.67	0.43	1	0.78	6.6	482.148	303.06	571.107	478.582	11.36	0.58	1.38347
Pan_pansicus	MRAC 29030	LM2	0.81	0.77	1.1	0.88	7.44	623.644	589.495	671.418	573.124	14.42	0.75	1.67033
Pan_pansicus	MRAC 29055	LM2	0.56	0.82	1.16	1.03	8.05	435.889	651.924	741.698	681.379	13.51	0.73	1.71413
Pan_pansicus	MRAC 84036M03	LM2	0.56	0.77	1.12	0.88	7.77	428.433	599.799	703.497	593.682	17.36	0.8	1.76295
Pan_pansicus	MRAC 84036M11	LM2	0.71	0.66	1.19	1.03	7.61	544.432	503.438	723.699	651.725	14.78	0.78	1.72276
Pan_troglodytes	MPI 13437	RM1	0.58	0.39	1.04	1	8.08	452.469	308.302	688.065	669.391	13.04	0.76	1.75226
Pan_troglodytes	ZMB 20811	RM1	0.48	0.46	1.01	1.01	7.92	371.049	356.066	663.386	663.386	12.92	0.74	1.71184
Pan_troglodytes	ZMB 32356	RM1	0.58	0.57	1.04	1.06	7.41	434.313	426.562	642.691	651.576	14.55	0.78	1.69997
Pan_troglodytes	ZMB 35526	RM1	0.34	0.42	0.88	1.05	8.15	273.901	331.832	617.354	697.49	12.15	0.7	1.68893
Pan_troglodytes	ZMB 0A16207	LM1	0.51	0.58	0.9	1	7.38	380.073	433.5	578.34	622.905	12.37	0.69	1.59565
Pan_troglodytes	ZMB 83623	LM1	0.67	1.09	1.3	1.21	8.08	525.254	901.763	808.653	767.01	15.48	0.85	1.85311
Pan_troglodytes	MPI 11800	RM2	0.56	0.69	1.12	1.16	8.63	451.332	558.075	763.938	783.181	12.67	0.77	1.82279
Pan_troglodytes	MPI 13433	RM2	0.72	0.67	1.3	1.2	9.05	596.216	553.505	882.098	832.943	16.75	0.94	2.0624
Pan_troglodytes	MPI 13437	RM2	0.87	0.79	1.26	1.09	9.13	732.004	659.947	868.421	784.143	14.41	0.89	2.01565
Pan_troglodytes	ZMB 31279	RM2	0.58	0.49	1	1.08	7.63	440.275	371.371	639.507	675.638	12.48	0.68	1.61065
Pan_troglodytes	ZMB 72844	RM2	0.59	0.64	0.96	0.94	9.03	486.378	527.715	712.474	702.438	12.78	0.72	1.803
Pan_troglodytes	ZMB 83661	RM2	0.39	0.47	0.87	0.83	6.65	276.525	332.559	519.686	502.758	10.57	0.58	1.3887
Pan_troglodytes	ZMB 30847	LM2	0.55	0.66	1.09	0.98	7.54	414.601	501.415	673.905	624.534	13.72	0.78	1.71482
Pan_troglodytes	MPI 11779	RM3	0.59	0.82	1.31	1.1	8.48	471.346	665.779	843.68	743.853	11.48	0.64	1.6473
Pan_troglodytes	MPI 11800	LM3	0.28	0.57	1.05	1.04	7.96	228.199	441.337	684.561	679.939	13.26	0.74	1.71616
Pan_troglodytes	ZMB 83655	LM3	0.64	0.46	1.18	1.06	7.23	476.476	339.414	691.797	639.269	14.91	0.85	1.75293
Pongo	SMF 1577	RM1	0.57	0.79	1.2	1.11	10.74	516.019	710.866	955.884	906.746	12.46	0.86	2.149
Pongo	SMF 2654	LM1	0.71	0.91	1.32	0.93	10.01	616.389	798.685	965.154	760.171	13.56	0.85	2.06258
Pongo	SMF 38296	LM1	0.78	0.88	1.25	1.39	10.18	684.085	776.206	941.442	1014.69	14.12	0.95	2.19898
Pongo	SMF 15837	RM2	0.88	0.75	1.45	1.11	9.9	766.86	648.438	1023.56	847.976	14.2	0.99	2.21371
Pongo	SMF 59140	RM2	1.07	1.22	1.68	1.51	10.52	972.323	1125.83	1194.71	1104.91	15.69	1.1	2.40541
Pongo	SMF 38296	LM2	1.62	1.25	1.97	1.35	12.19	1642.11	1223.75	1503.44	1148.9	21.26	1.21	2.71569
Pongo	ZMB 12209 755a	RM3	1.08	1.08	1.53	1.39	9.19	933.169	933.169	1006.24	937.175	22.15	1.16	2.30872
Pongo	ZMB 6957	RM3	0.91	1.27	1.57	1.27	8.22	737.926	1086.23	945.252	805.255	24.09	1.29	2.30259
Pongo	ZMB 83515	LM3	1.04	1.04	1.52	1.2	10.11	927.544	927.544	1076.63	910.054	13.03	0.89	2.12107
*data from [17]
